# Supplementary material for: Green, Hydrothermal Synthesis of Fluorescent Carbon Nanodots from Gardenia, Enabling the Detection of Metronidazole in Pharmaceuticals and Rabbit Plasma
Source: PubMed Central journal article supplement (PMC5949037; doi:10.3390/s18040964), 2018-03-24
Supplement: sensors-18-00964-s001.pdf [file sensors-18-00964-s001.pdf]

## Supplementary Material

# Green, hydrothermal synthesis of fluorescent carbon nanodots from gardenia enabling detection of metronidazole in pharmaceuticals and rabbit plasma

Xiupei Yang <sup>1,\*</sup>, Mingxian Liu <sup>1</sup>, Yanru Yin <sup>1</sup>, Fenglin Tang <sup>1</sup>, Hua Xu <sup>1</sup> and Xiangjun Liao <sup>2</sup>

<sup>1</sup> College of Chemistry and Chemical Engineering, Chemical Synthesis and Pollution Control Key Laboratory of Sichuan Province, China West Normal University, Nanchong 637000, China; mxliu\_chem@163.com (M.L.); tfl06180205@126.com (F.T.); bigtree.xu@foxmail.com (H.X.)

<sup>2</sup> Exposure and Biomonitoring Division, Health Canada, 50 Colombine Driveway, Ottawa, K1A 0K9 Canada; xiangjun.liao@mail.mcgill.ca

\* Correspondence: xiupeiyang@163.com; Tel.: +86-817-2568-081

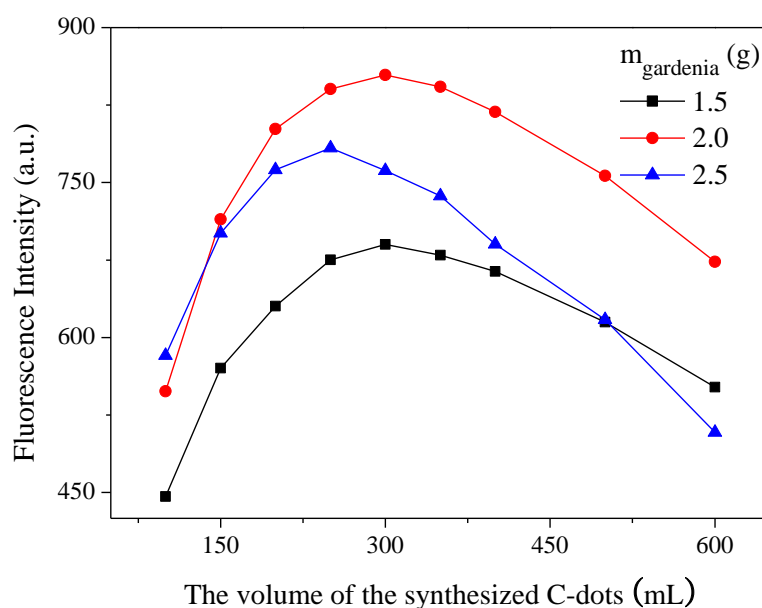

**Figure S1.** Effect of various quantity of gardenia for synthesis FCNs and differential dilution ratio on the fluorescence intensity of FCNs solution at 220 °C for 10 h.

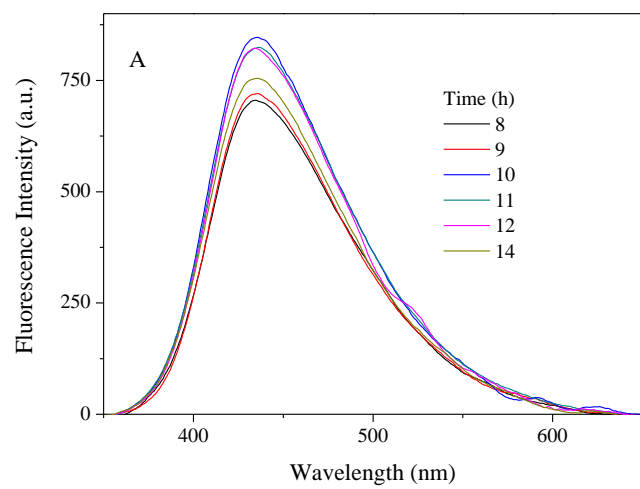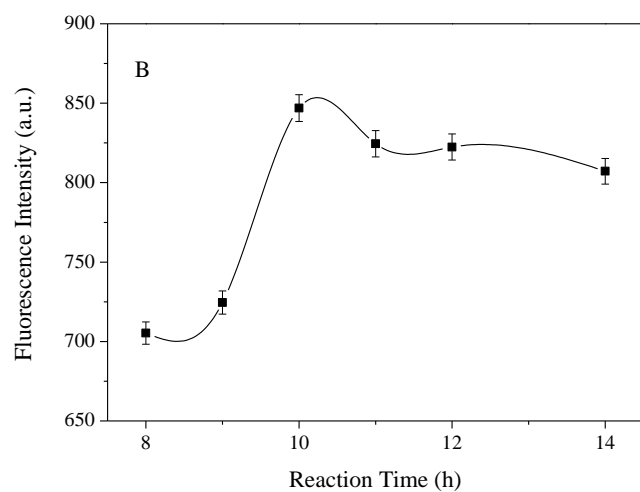

**Figure S2.** Fluorescence spectra (A) and fluorescence intensity (B) of C-dots prepared under various reaction times.

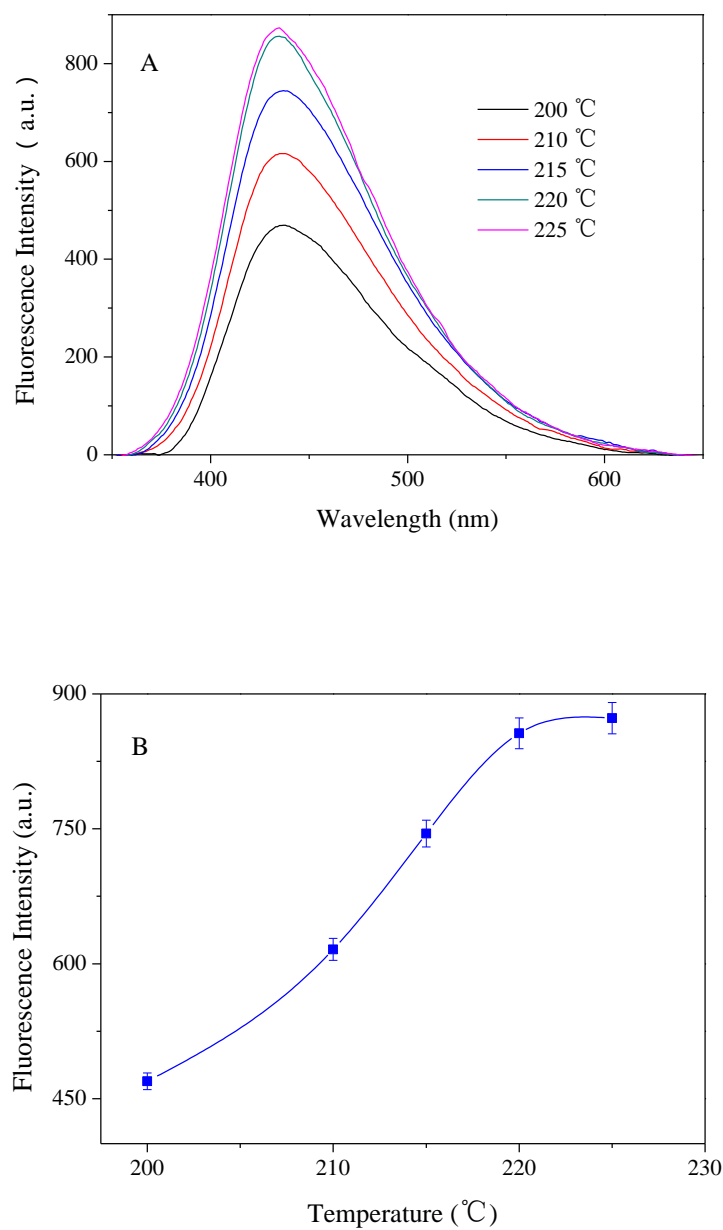

**Figure S3.** Fluorescence spectra (A) and fluorescence intensity (B) of C-dots prepared under various temperature.

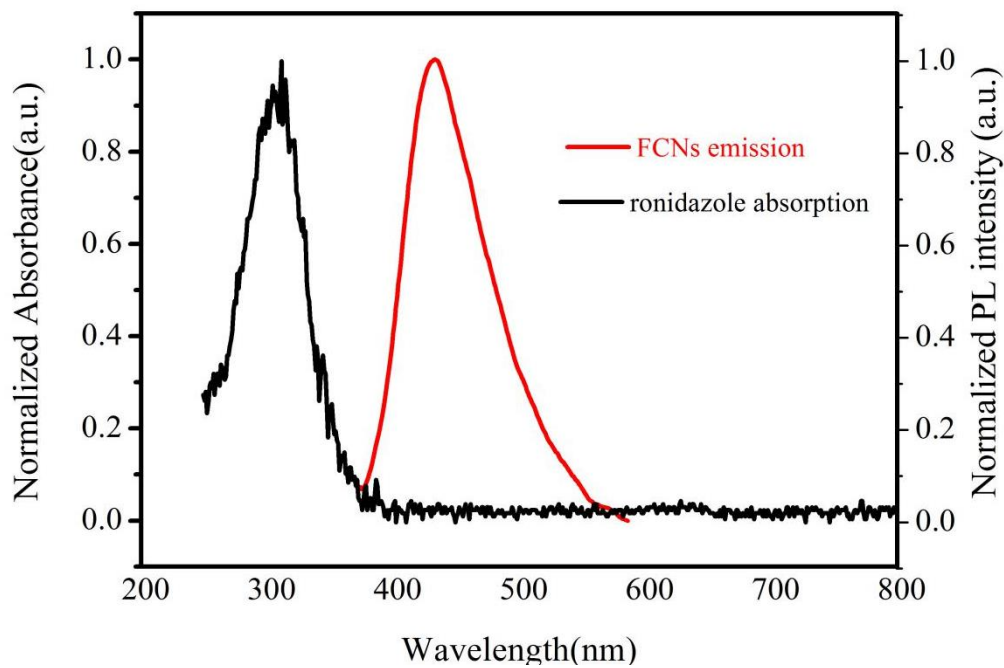

Figure S4. Overlapping between Fluorescence spectra of FCNs and the UV-vis absorption spectra of ronidazole.

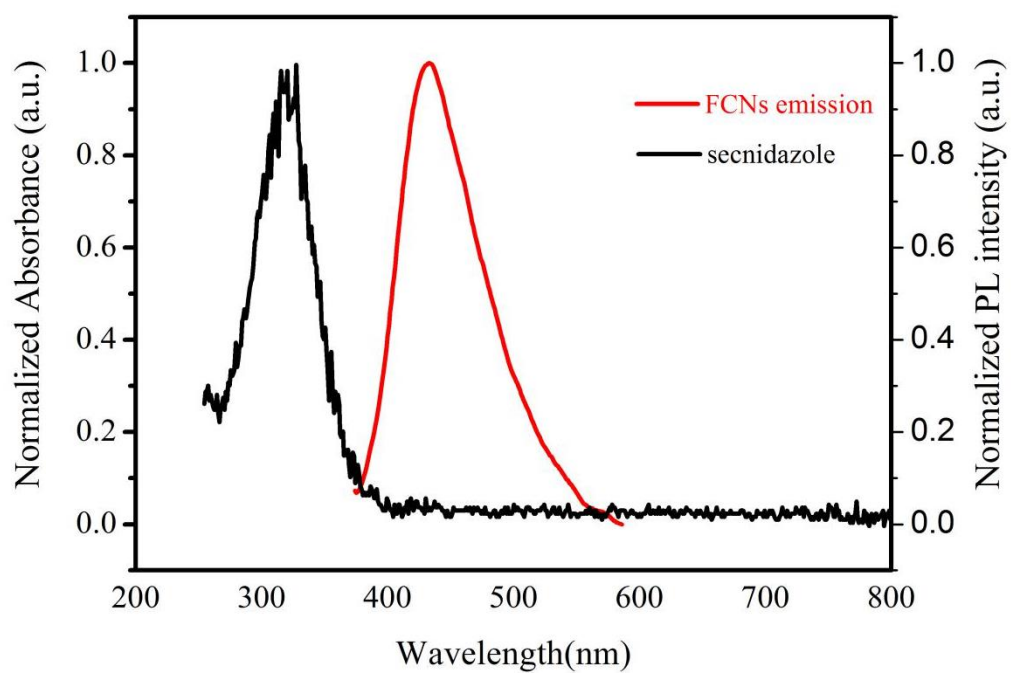

Figure S5. Overlapping between Fluorescence spectra of FCNs and the UV-vis absorption spectra of secnidazole.

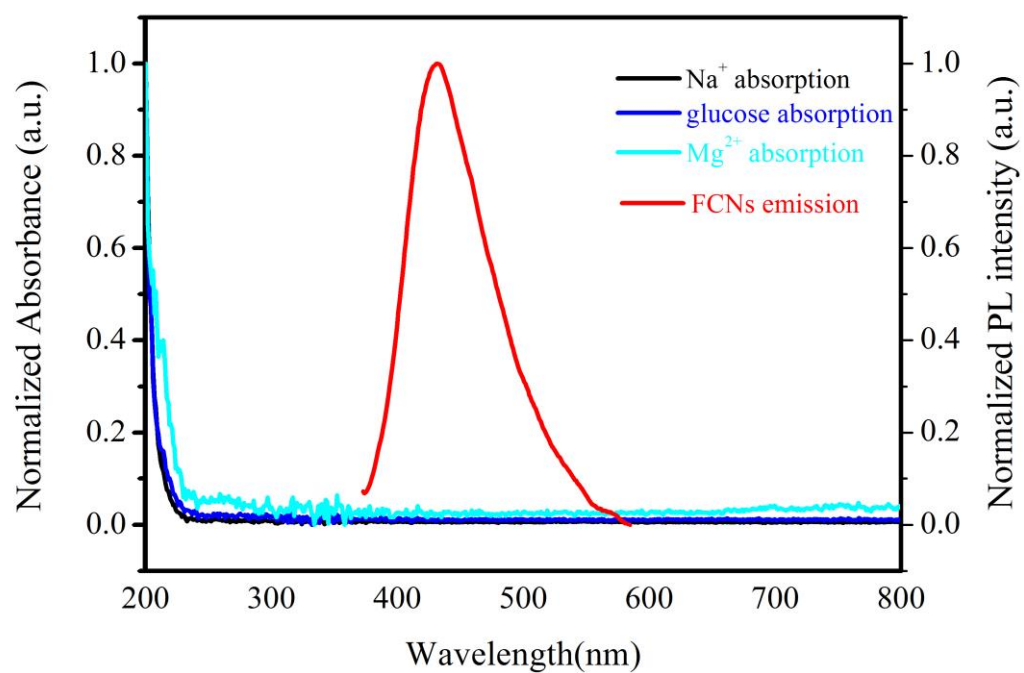

Figure S6. Overlapping between Fluorescence spectra of FCNs and the UV-vis absorption spectra of glucose, Na<sup>+</sup> and Mg<sup>2+</sup>.

1

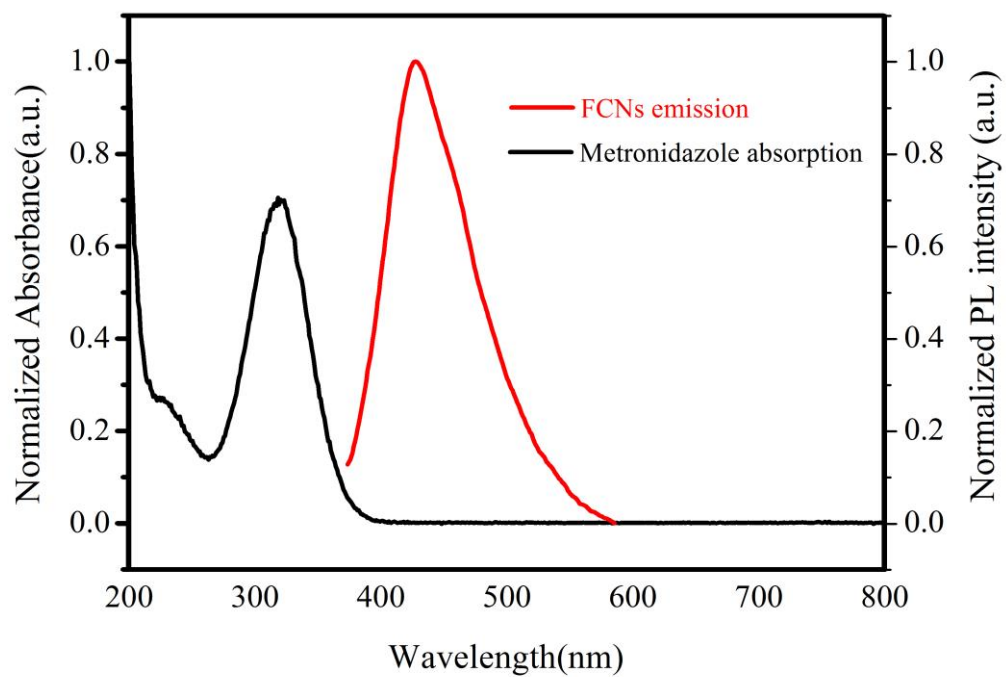

2

3 Figure S7. Overlapping between fluorescence spectra of FCNs and the UV-vis absorption spectra of  
4 metronidazole.
